# Supplementary material
Source: PubMed Central journal article supplement (PMC4604380)
Supplement: AAC.01255-15_zac011154530so1.pdf [file AAC.01255-15_zac011154530so1.pdf]

## Supplementary data

**Supplementary figure 1. Association of polymorphisms in candidate genes with drug sensitivities.** The associations between susceptibilities to eight antimalarial drugs and an insert in *K13*, the number variation of repeat R<sub>1</sub> and R<sub>2</sub> in *pfmhe-1*, and SNPs in *K13*, *pfmdr1*, *pfmrp1*, *pfdhfr* and *pfdhps* were analyzed by Mann-Whitney *U* test or Kruskal-Wallis test. Significant levels are indicated by the *P* values. DHA<sup>RSA</sup> were ring-stage survival rate (%) determined by RSA. The remaining values were IC<sub>50</sub>s determined using the SYBR Green I-based assay. The RSA result and IC<sub>50</sub> values of DHA, ATS and PND are shown as median, whereas the rest of the drugs are shown as mean. ATS, artesunate; CQ, chloroquine; PPQ, piperaquine; QN, quinine; PND, pyronaridine; LMF, lumefantrine; MQ, mefloquine.

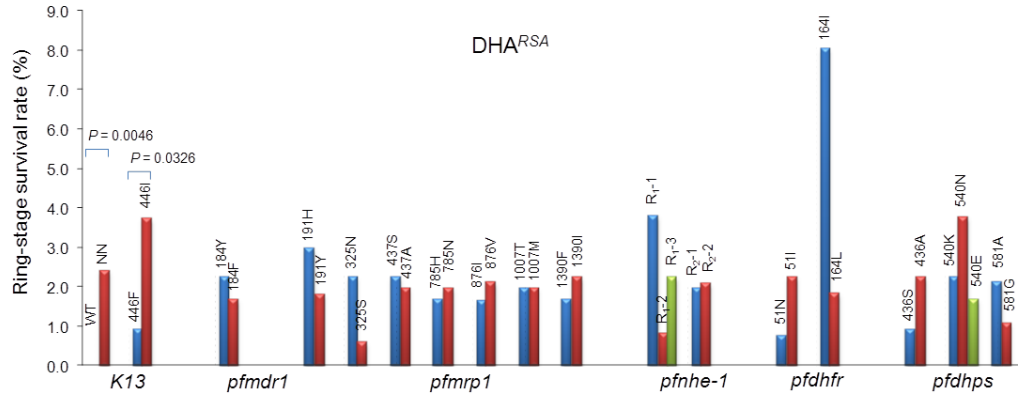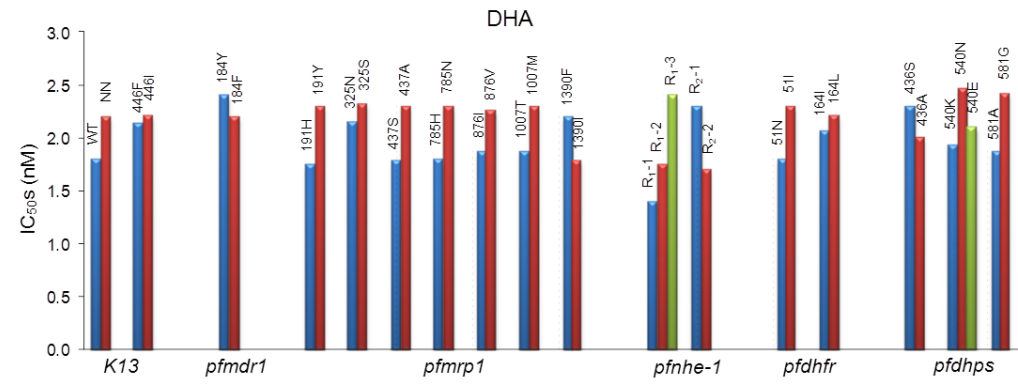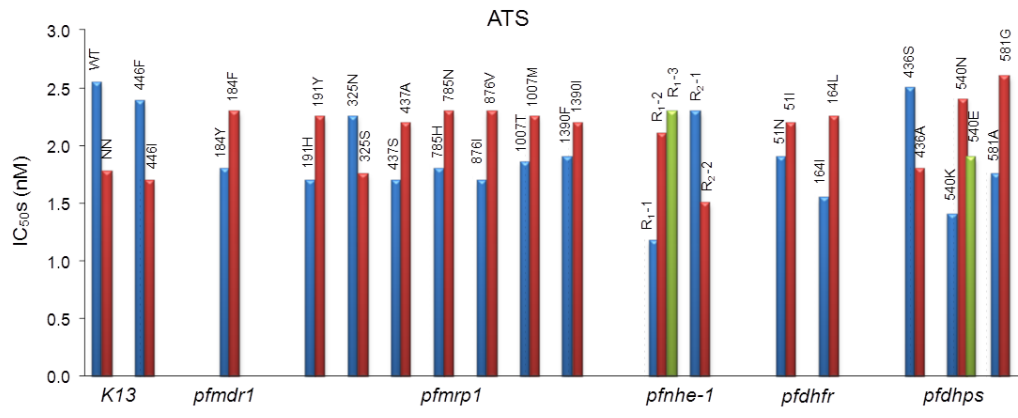

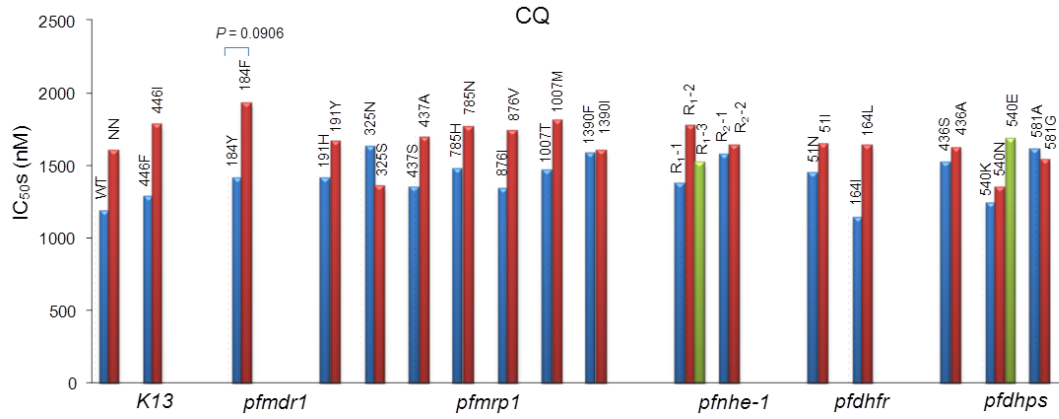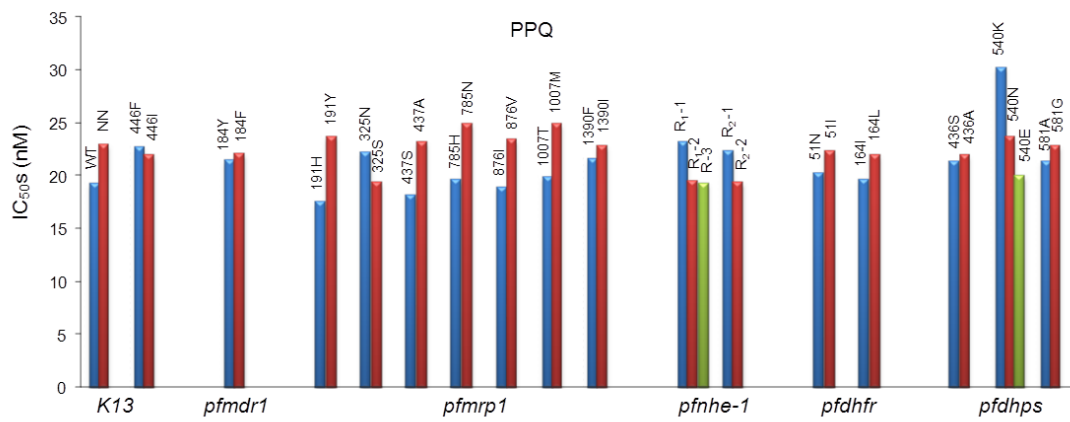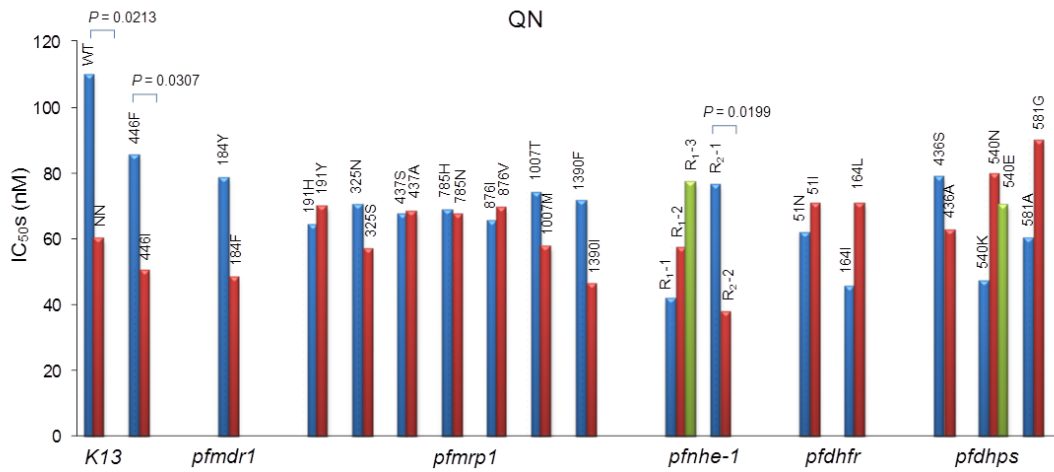

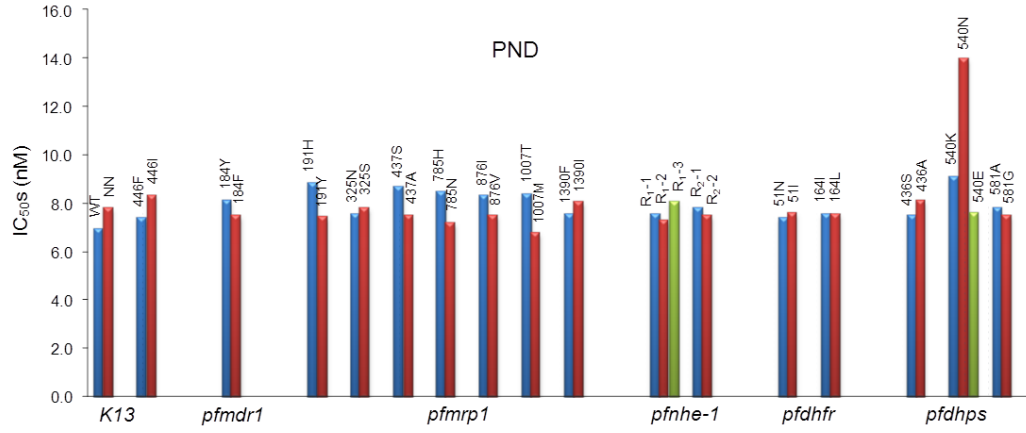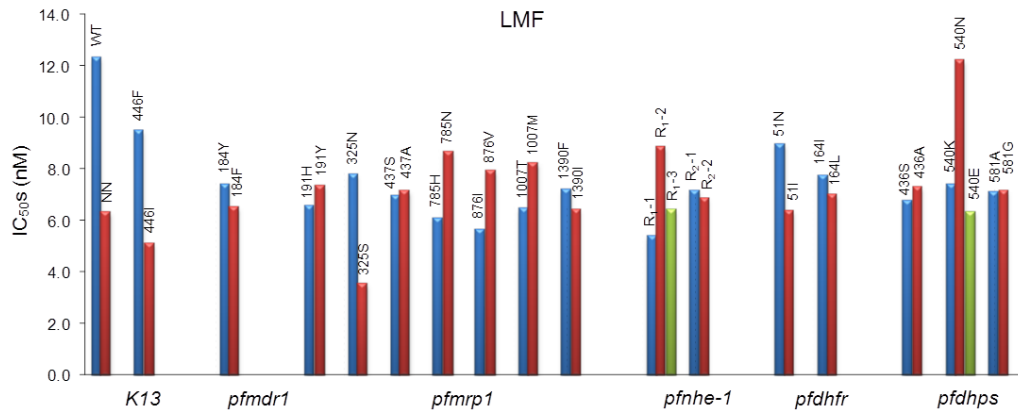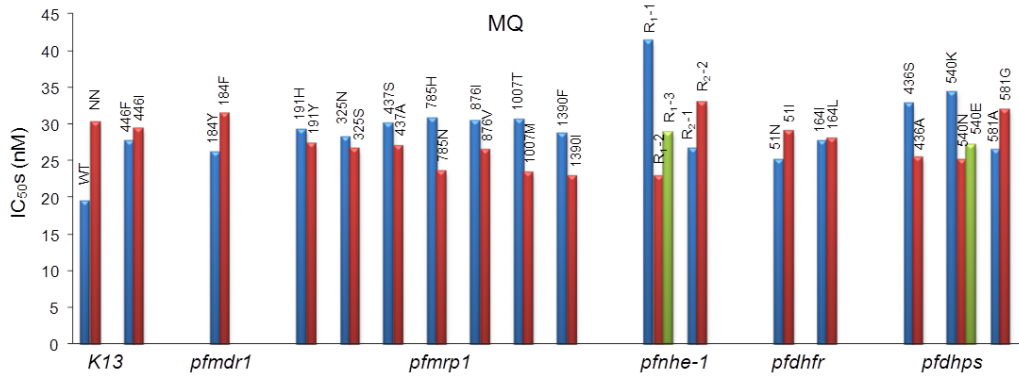

**Supplementary figure 2. Alignment of the 6 *pfnhe-1* ms4760 alleles.** Two repeats (R1, DNNND, and R2, NHNDNHNNDDDD) are highlighted in grey. Mutation shows in red.

```

1   KKKKISGSNDNDNNNDNNND-----DKNNKNDDDNHNDNHNNDDDNHNDNHNNDD-----NNNDNHDDDDNNSSHYNKEKE
3   KKKKISGSNDNDNNNDNNND-----NHNDKNNKNDDDNHNDNHNNDDDNHNDNHNNDD-----NNNDNHDDDDNNSSHYNKEKE
6   KKKKISGSNDNDNNNDNNND-----NHNDKNNKNDDDNHNDNHNNDD-----NNNDNHDDDDNNSSHYNKEKE
7   KKKKISGSNDNDNNNDNNNDNNNDNHNDKNNKNDDDNHNDNHNNDD-----NNNDNHDDDDNNSSHYNKEKE
12  KKKKISGSNDNDNNND-----DKNNKNDDDNHNDNHNNDDDNHNDNHNNDDDNHNDNHNNDDNNNDNHDDDDNNSSHYNKEKE
18  KKKKISGSNDNDNNNDNNND-----NHNDKNNKNDDDNHNDNHNNDDDNHNDNHNNDD-----NNNDNHDDDDNNSSHYNKEKE

```

**Supplementary figure 3. Schematic illustration of the multilocus genotypes of the *P. falciparum* isolates.** A total of 34 haplotypes were identified and clustered based on their phylogenetic relationship. Empty and red-filled blocks indicate wild-type and mutated amino acids, respectively. Frequencies (%) of haplotypes are shown in the right column.

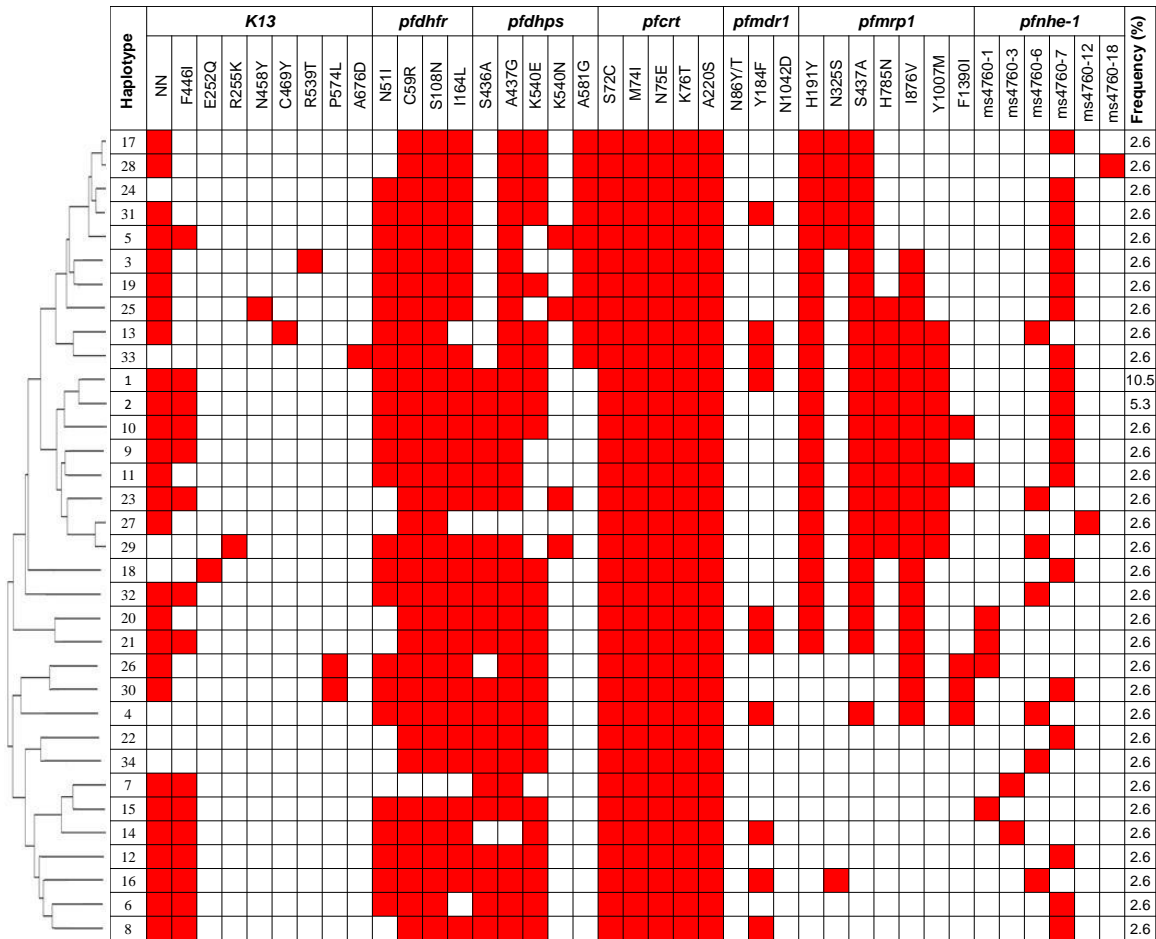

\*The order of haplotypes is based on the frequency.

**Supplementary table 1.** Comparison of the frequencies [N (%)] of mutations in six genes associated with drug resistance between day 3-positive and -negative isolates.

| <b>Gene</b>    | <b>Mutation /repeat</b> | <b>Day 3 positive</b> | <b>Day 3 negative</b> | <b>P-value*</b> | <b>Total</b> |
|----------------|-------------------------|-----------------------|-----------------------|-----------------|--------------|
| <i>pfdhfr</i>  | N51 <b>I</b>            | 14 (82.4)             | 12 (57.1)             | 0.1612          | 16 (68.4)    |
|                | C59 <b>R</b>            | 16 (94.1)             | 21 (100)              | 0.4474          | 37 (97.4)    |
|                | S108 <b>N</b>           | 16 (94.1)             | 21 (100)              | 0.4474          | 37 (97.4)    |
|                | I164 <b>L</b>           | 14 (82.4)             | 20 (95.2)             | 0.3068          | 34 (89.5)    |
| <i>pfdhps</i>  | S436 <b>A</b>           | 13 (76.5)             | 12 (57.1)             | 0.3068          | 25 (65.8)    |
|                | A437 <b>G</b>           | 16 (94.1)             | 20 (95.2)             | 1.000           | 36 (94.7)    |
|                | K540 <b>E/N</b>         | 13 (76.5)             | 20 (95.2)             | 0.1524          | 33 (86.8)    |
|                | A581 <b>G</b>           | 3 (17.6)              | 7 (33.3)              | 0.4604          | 10 (26.3)    |
| <i>pfprt</i>   | S72 <b>C</b>            | 17 (100)              | 21 (100)              | 1.000           | 38 (100)     |
|                | M74 <b>I</b>            | 17 (100)              | 21 (100)              | 1.000           | 38 (100)     |
|                | N75 <b>E</b>            | 17 (100)              | 21 (100)              | 1.000           | 38 (100)     |
|                | K76 <b>T</b>            | 17 (100)              | 21 (100)              | 1.000           | 38 (100)     |
|                | A220 <b>S</b>           | 17 (100)              | 21 (100)              | 1.000           | 38 (100)     |
| <i>pfmndr1</i> | N86 <b>Y/T</b>          | 0 (0)                 | 0 (0)                 | 1.000           | 0 (0)        |
|                | Y184 <b>F</b>           | 7 (41.2)              | 6 (28.6)              | 0.5017          | 13 (34.2)    |
|                | N1042 <b>D</b>          | 0 (0)                 | 0 (0)                 | 1.000           | 0 (0)        |
| <i>pfmrpl</i>  | H191 <b>Y</b>           | 10 (58.8)             | 16 (76.2)             | 0.3073          | 26 (68.4)    |
|                | N325 <b>S</b>           | 1 (5.9)               | 5 (23.8)              | 0.1965          | 6 (15.8)     |
|                | S437 <b>A</b>           | 11 (64.7)             | 16 (76.2)             | 0.491           | 27 (71.1)    |
|                | H785 <b>N</b>           | 8 (47.1)              | 7 (33.3)              | 0.5091          | 15 (39.5)    |
|                | I876 <b>V</b>           | 10 (58.8)             | 14 (66.6)             | 0.7396          | 24 (63.2)    |
|                | T1007 <b>M</b>          | 8 (47.1)              | 6 (28.6)              | 0.3176          | 14 (36.8)    |
|                | F1390 <b>I</b>          | 3 (17.6)              | 2 (9.5)               | 0.6396          | 5 (13.2)     |
| <i>pfmhe-1</i> | Rep-1                   | 15 (88.2)             | 20 (95.2)             | 0.5768          | 35 (92.1)    |
|                | Rep-2                   | 3 (17.6)              | 5 (23.8)              | 0.7087          | 8 (21.1)     |

\* Comparison between the two groups (Fisher's exact test).
